# Supplementary material
Source: publisher figshare collection journal article supplement (https://geolsoc.figshare.com/ndownloader/files/24182472)
Supplement: Supplementary file 1 [file 24182472]

| 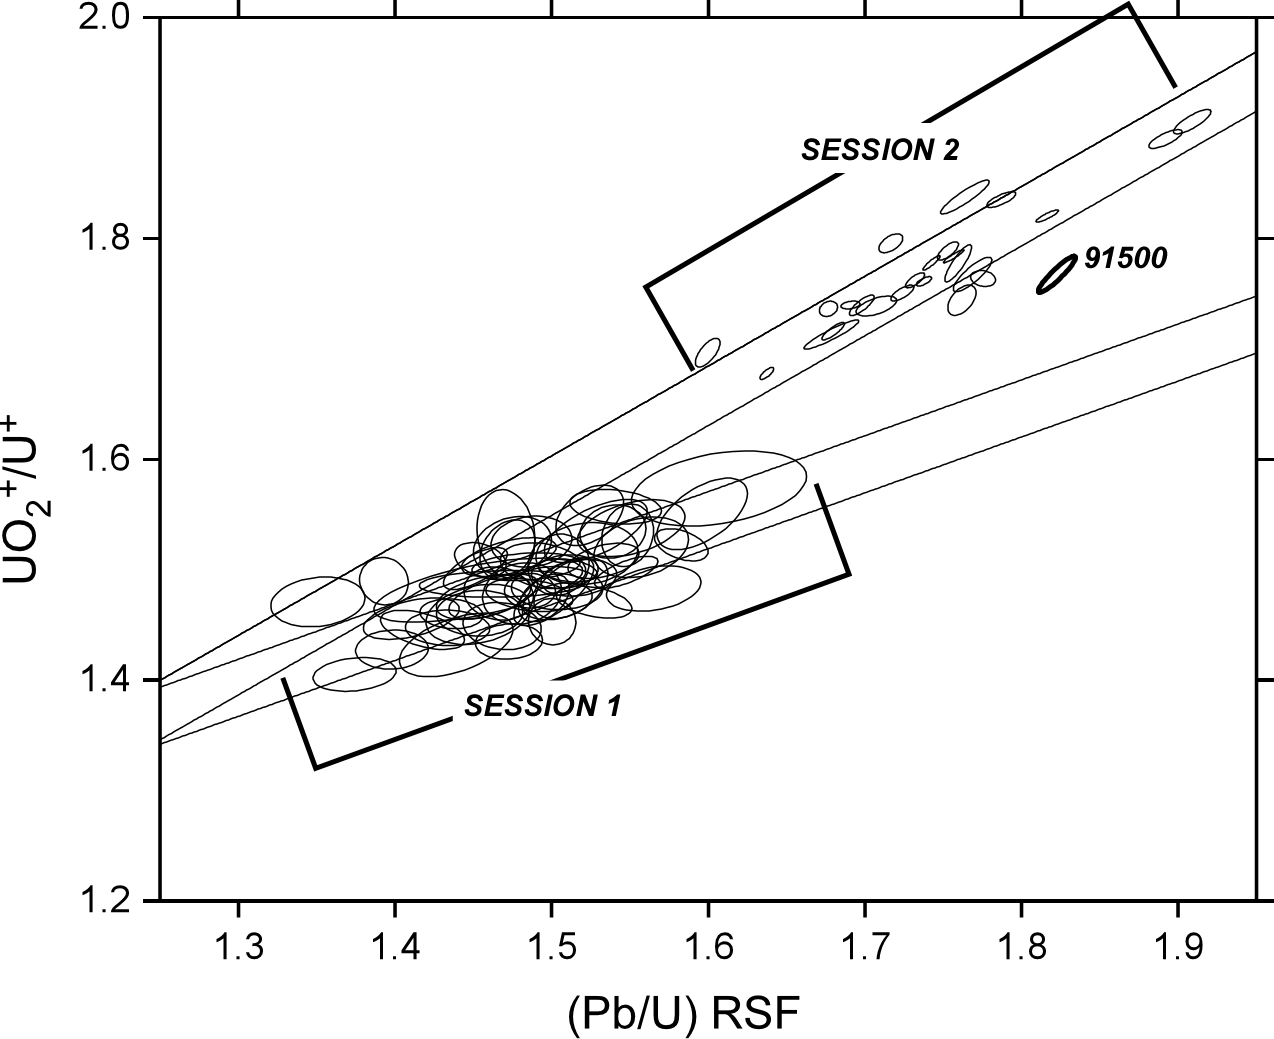 |
| --- |

**S1 Figure.** Calibration curves (UO2+/U+) vs. (Pb/U)Relative Sensitivity Factor for AS3 and 91500 standards (indicated) sputtered over sessions 1 and 2. See manuscript text for details regarding the calibration. Straight lines outline the ±1 regression.
